# Supplementary material for: Health service use of infants involved in family justice care and supervision proceedings in Wales: a data linkage study
Source: PubMed Central journal article supplement — Int J Popul Data Sci. 2024 Apr 15;9(2):2362. doi: 10.23889/ijpds.v9i1.2362 (PMC11606540; doi:10.23889/ijpds.v9i1.2362), 2024-04-15

## Supplementary Appendix

Supplementary Table 1: ICD-10 chapter to read diagnosis code chapter descriptions and mapping

| ICD-10 Chapter | ICD-10 Chapter description                                                                          | ICD codes (inclusive) | Read diagnosis chapter description             | Read diagnosis chapter code (1st character) |
|----------------|-----------------------------------------------------------------------------------------------------|-----------------------|------------------------------------------------|---------------------------------------------|
| 1              | Certain infectious and parasitic diseases                                                           | A00–B99               | Infectious and parasitic diseases              | A                                           |
| 2              | Neoplasms                                                                                           | C00–D48               | Neoplasms                                      | B                                           |
| 3              | Diseases of the blood and blood-forming organs and certain disorders involving the immune mechanism | D50–D89               | Diseases of the blood and blood-forming organs | D                                           |
| 4              | Endocrine, nutritional, and metabolic diseases                                                      | E00–E90               | Endocrine, nutritional, and metabolic diseases | C                                           |
| 5              | Mental and behavioural disorders                                                                    | F00–F99               | Mental disorders                               | E                                           |
| 6              | Diseases of the nervous system                                                                      | G00–G99               | Nervous system and sense organ diseases        | F                                           |
| 7              | Diseases of the eye and adnexa                                                                      | H00–H59               | Nervous system and sense organ diseases        | F                                           |
| 8              | Diseases of the ear and mastoid process                                                             | H60–H95               | Nervous system and sense organ diseases        | F                                           |
| 9              | Diseases of the circulatory system                                                                  | I00–I99               | Circulatory system diseases                    | G                                           |
| 10             | Diseases of the respiratory system                                                                  | J00–J99               | Respiratory system diseases                    | H                                           |
| 11             | Diseases of the digestive system                                                                    | K00–K93               | Digestive system diseases                      | J                                           |
| 12             | Diseases of the skin and subcutaneous tissue                                                        | L00–L99               | Skin and subcutaneous tissue diseases          | M                                           |
| 13             | Diseases of the musculoskeletal system and connective tissue                                        | M00–M99               | Musculoskeletal and connective tissue diseases | N                                           |
| 14             | Diseases of the genitourinary system                                                                | N00–N99               | Genitourinary system diseases                  | K                                           |
| 17             | Congenital malformations, deformations, and chromosomal abnormalities                               | Q00–Q99               | Congenital anomalies                           | P                                           |
| 19             | Injury, poisoning and certain other consequences of external causes                                 | S00–T98               | Injury and poisoning                           | S                                           |
| 20             | External causes of morbidity and mortality                                                          | V01–Y98               | External causes of morbidity and mortality     | U                                           |

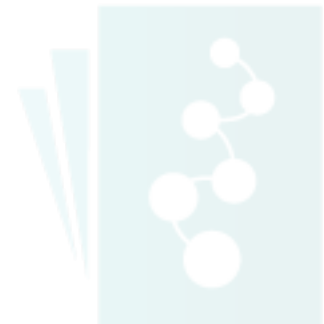

Supplement: ijpds-09-2362-s001.pdf [file ijpds-09-2362-s001.pdf]
